# Supplementary material for: Codon optimality controls differential mRNA translation during amino acid starvation
Source: PubMed Central journal article supplement — RNA. 2016 Nov;22(11):1719–27. doi: 10.1261/rna.058180.116 (PMC5066624; doi:10.1261/rna.058180.116), 2016-11
Supplement: supp_058180.116_Supp_Material.pdf [file supp_058180.116_Supp_Material.pdf]

## Supplementary Figures:

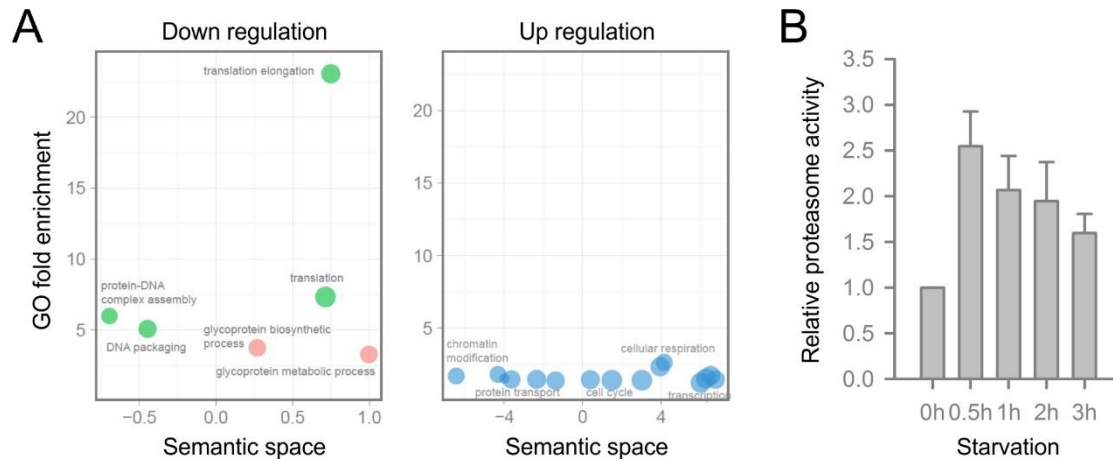

**Fig. S1. Differential translational regulation in response to amino acid starvation.**

(A) GO term enrichment in genes significantly downregulated (decrease > 3 fold) and upregulated (increase >3 fold) during amino acid starvation was summarized and visualized in semantic similarity based scatter plots using REViGO. x axis: likeliness of meaning between GO terms; y axis: Fold enrichment for GO category. Translation and protein DNA assembly related GO terms are shown in green, GO terms related to metabolic process are shown in red.

(B) Relative Proteasome activity in HEK 293 cells during amino acid starvation. Equal number of HEK293 cells were plated and then subjected to amino acid starvation for varying periods of time. The chymotrypsin like activity of proteasome was measure using a luminescence based reagent.

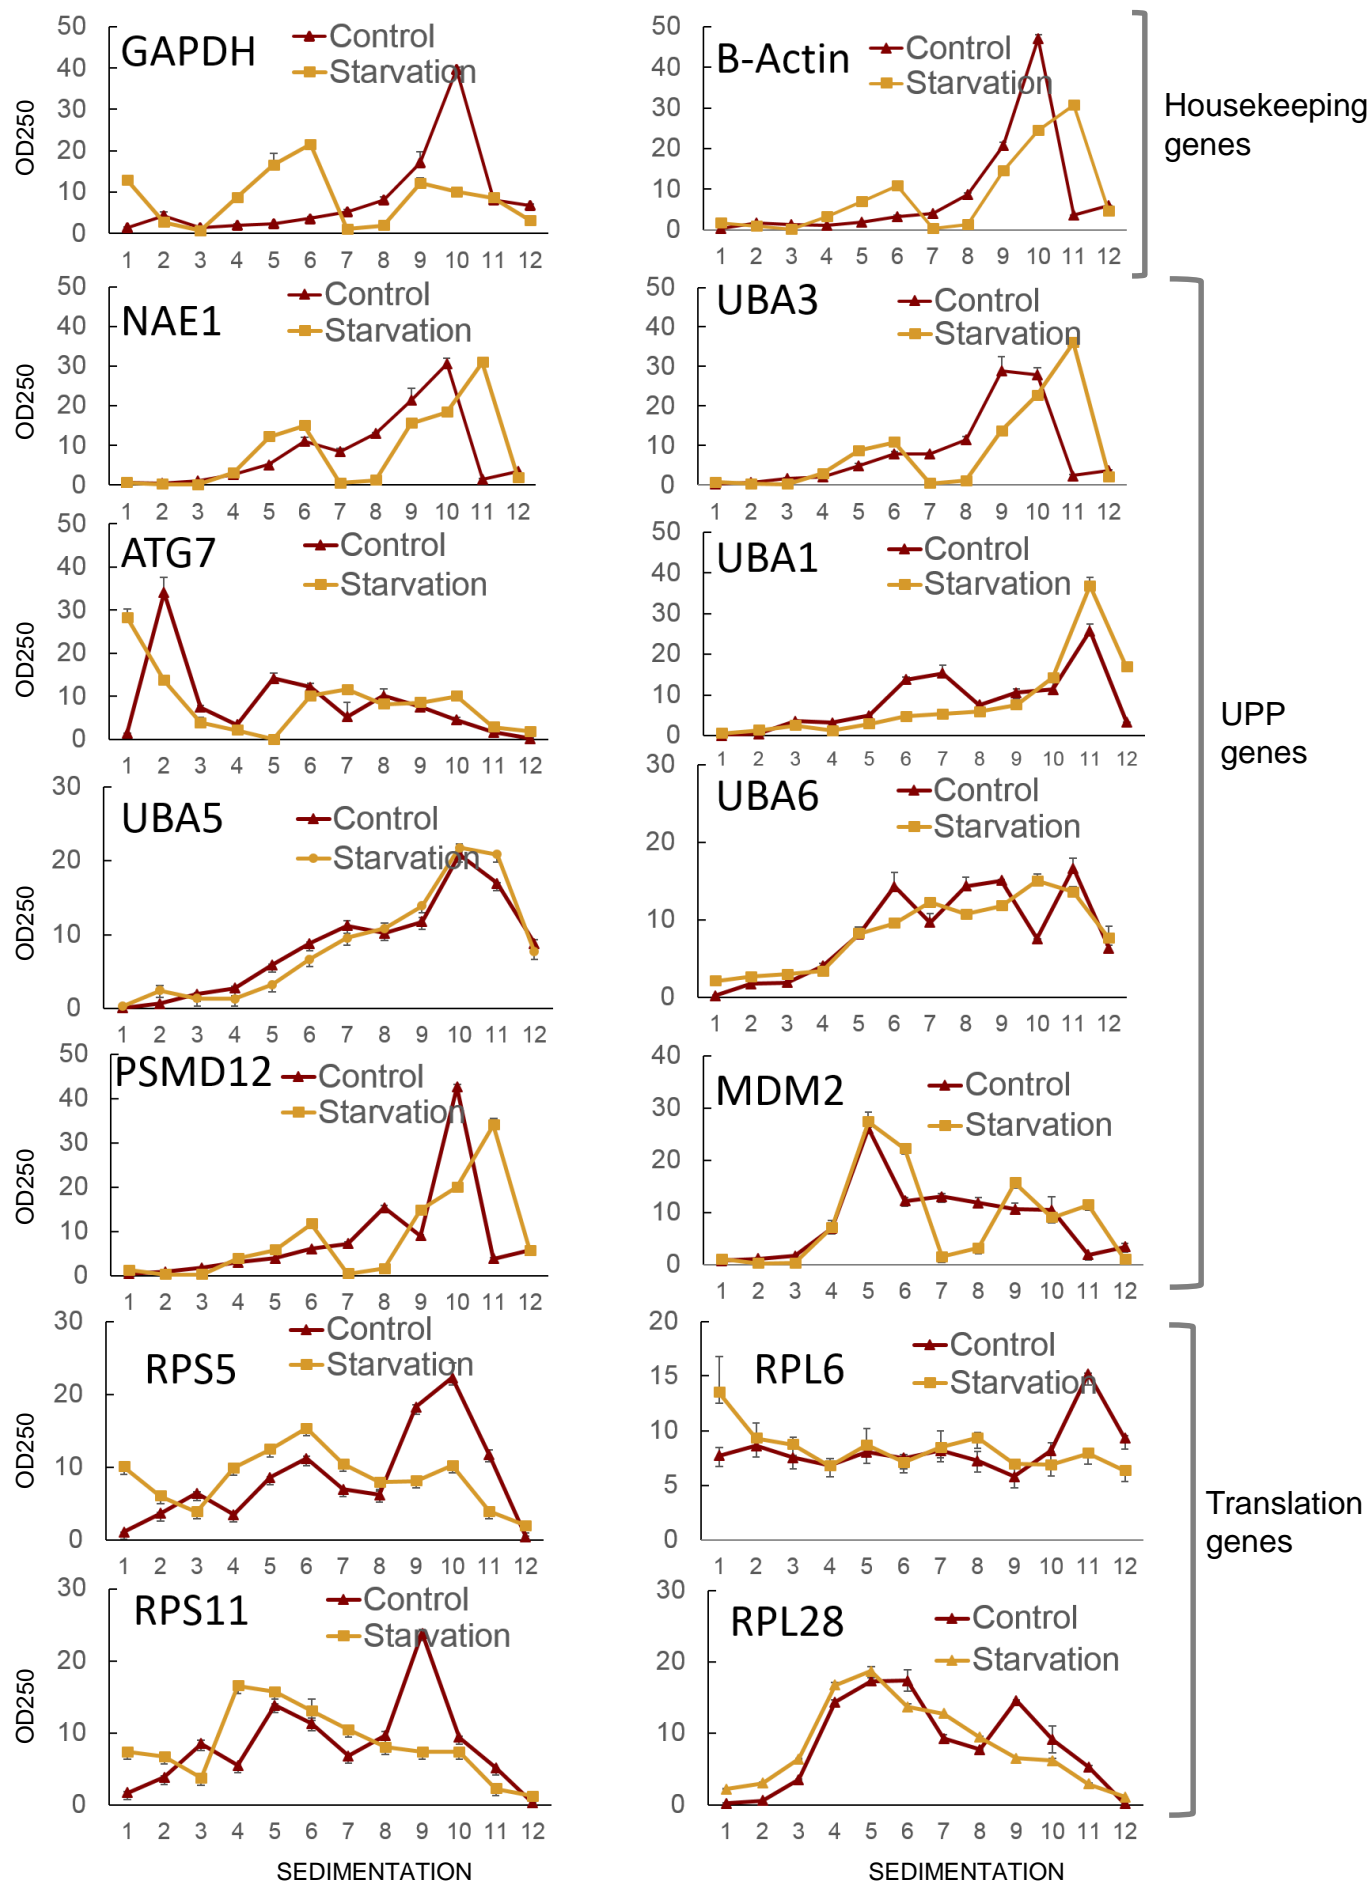

**Fig. S2.** Distribution of various mRNAs on sucrose gradient fractions obtained from HEK293 cells with or without amino acid starvation. qRT-PCR was used to determine the amount of target mRNAs present in all the sedimentation fraction. Values were normalized so that the sum of all fraction = 100

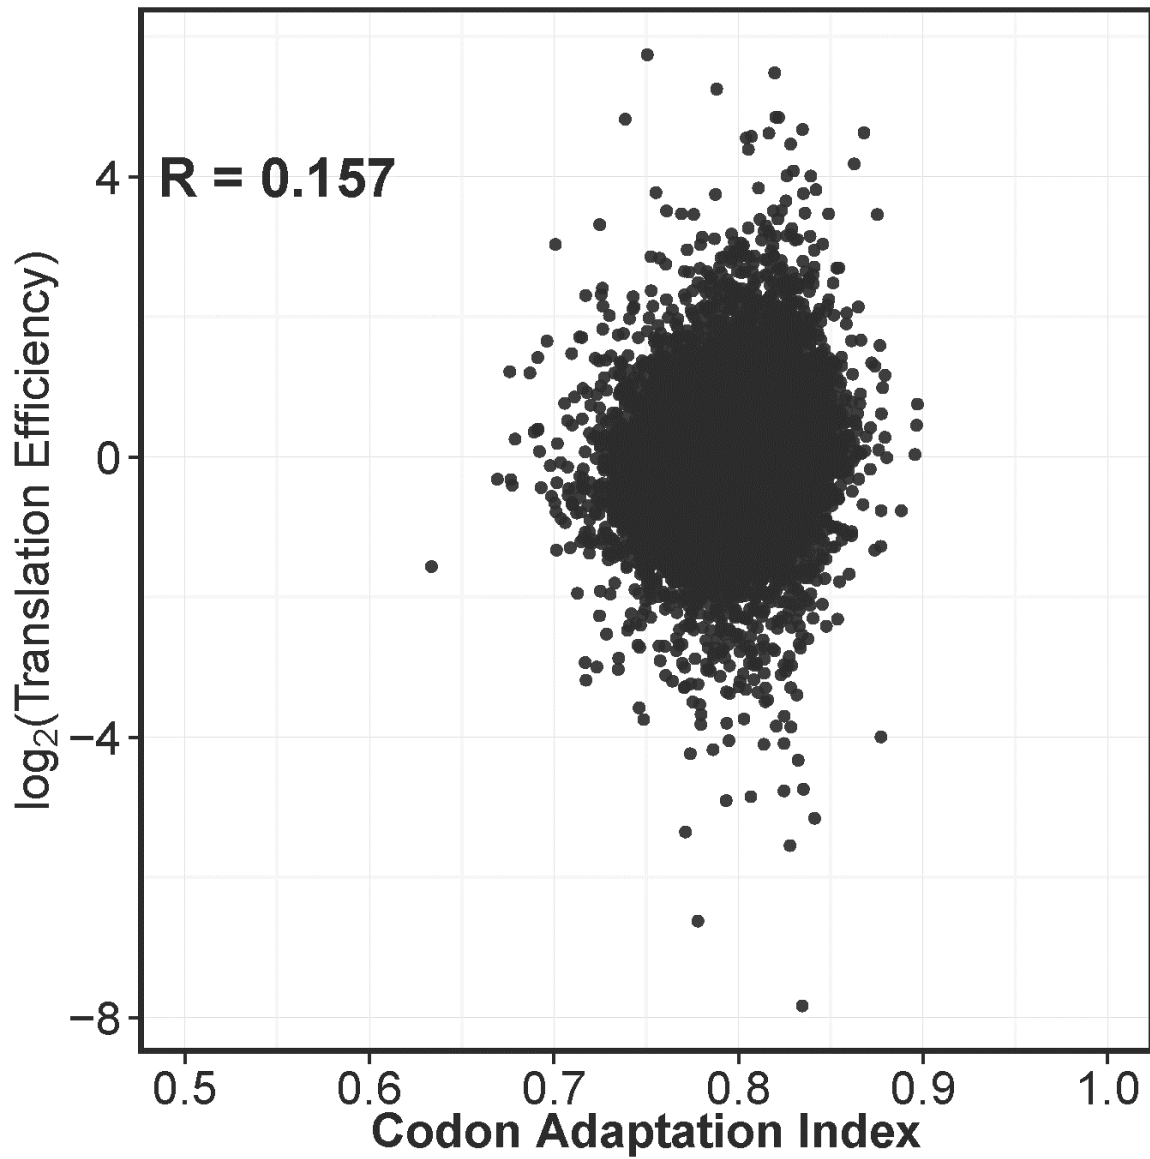

**Fig. S3.** Scatterplot showing the correlation between TE values of all genes with respective CAI values. The Pearson correlation coefficient is shown in the plot.

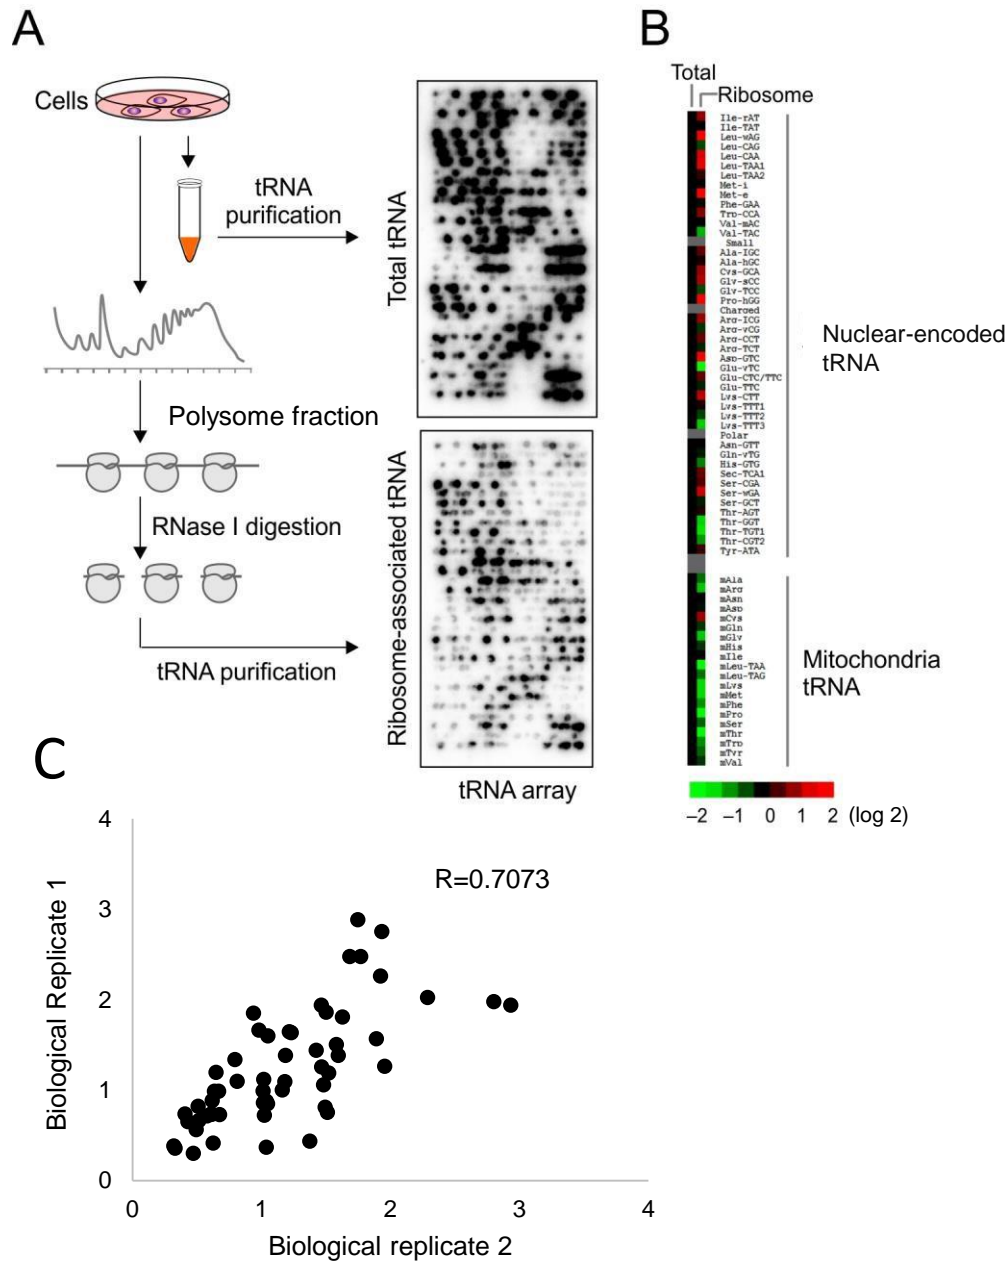

**Fig. S4. Microarray analysis of ribosome-associated tRNA molecules.**

(A) Schematic of the tRNA microarray method used to measure the tRNA levels in elongating ribosomes. (B) The relative levels of tRNA molecules in total cell lysates and ribosome associated samples are presented in a heatmap. The tRNAs are divided into groups based on the nature of amino acid they carry. The log<sub>2</sub> values of tRNA abundance is plotted. The color change from green to red signifies increasing abundance. The signal for mitochondrial tRNA<sup>Cys</sup> is most likely an experimental artifact arising due to high sequence similarity between cytoplasmic tRNA<sup>Cys</sup> and mitochondrial tRNA<sup>Cys</sup>. (C) Scatterplot showing correlation between two biological replicates for this experiment. The Pearson correlation coefficient is shown.

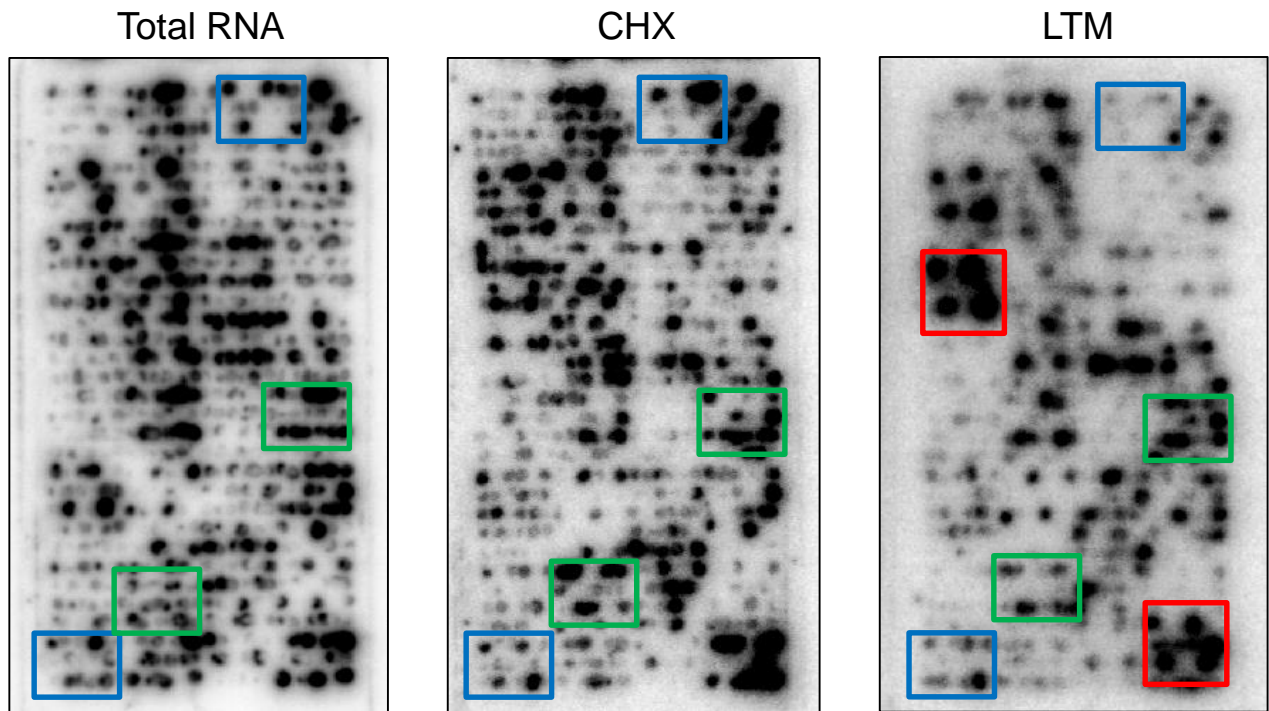

**Fig S5 Microarray analysis of LTM treated sample shows an increase in initiator-tRNA<sup>Met</sup> signal**  
 Microarrays showing tRNAs isolated from total cell lysate (total RNA), Cycloheximide treated polysome fractions (CHX) and lactimidomycin (LTM) treated monosome fractions respectively. The 8 tRNA<sub>i</sub><sup>Met</sup> spots are in red boxes. The 8 *E. coli* tRNA<sup>Lys</sup> spots are shown in blue boxes and the 8 *E. coli* tRNA<sup>Phe</sup> are shown in green boxes.

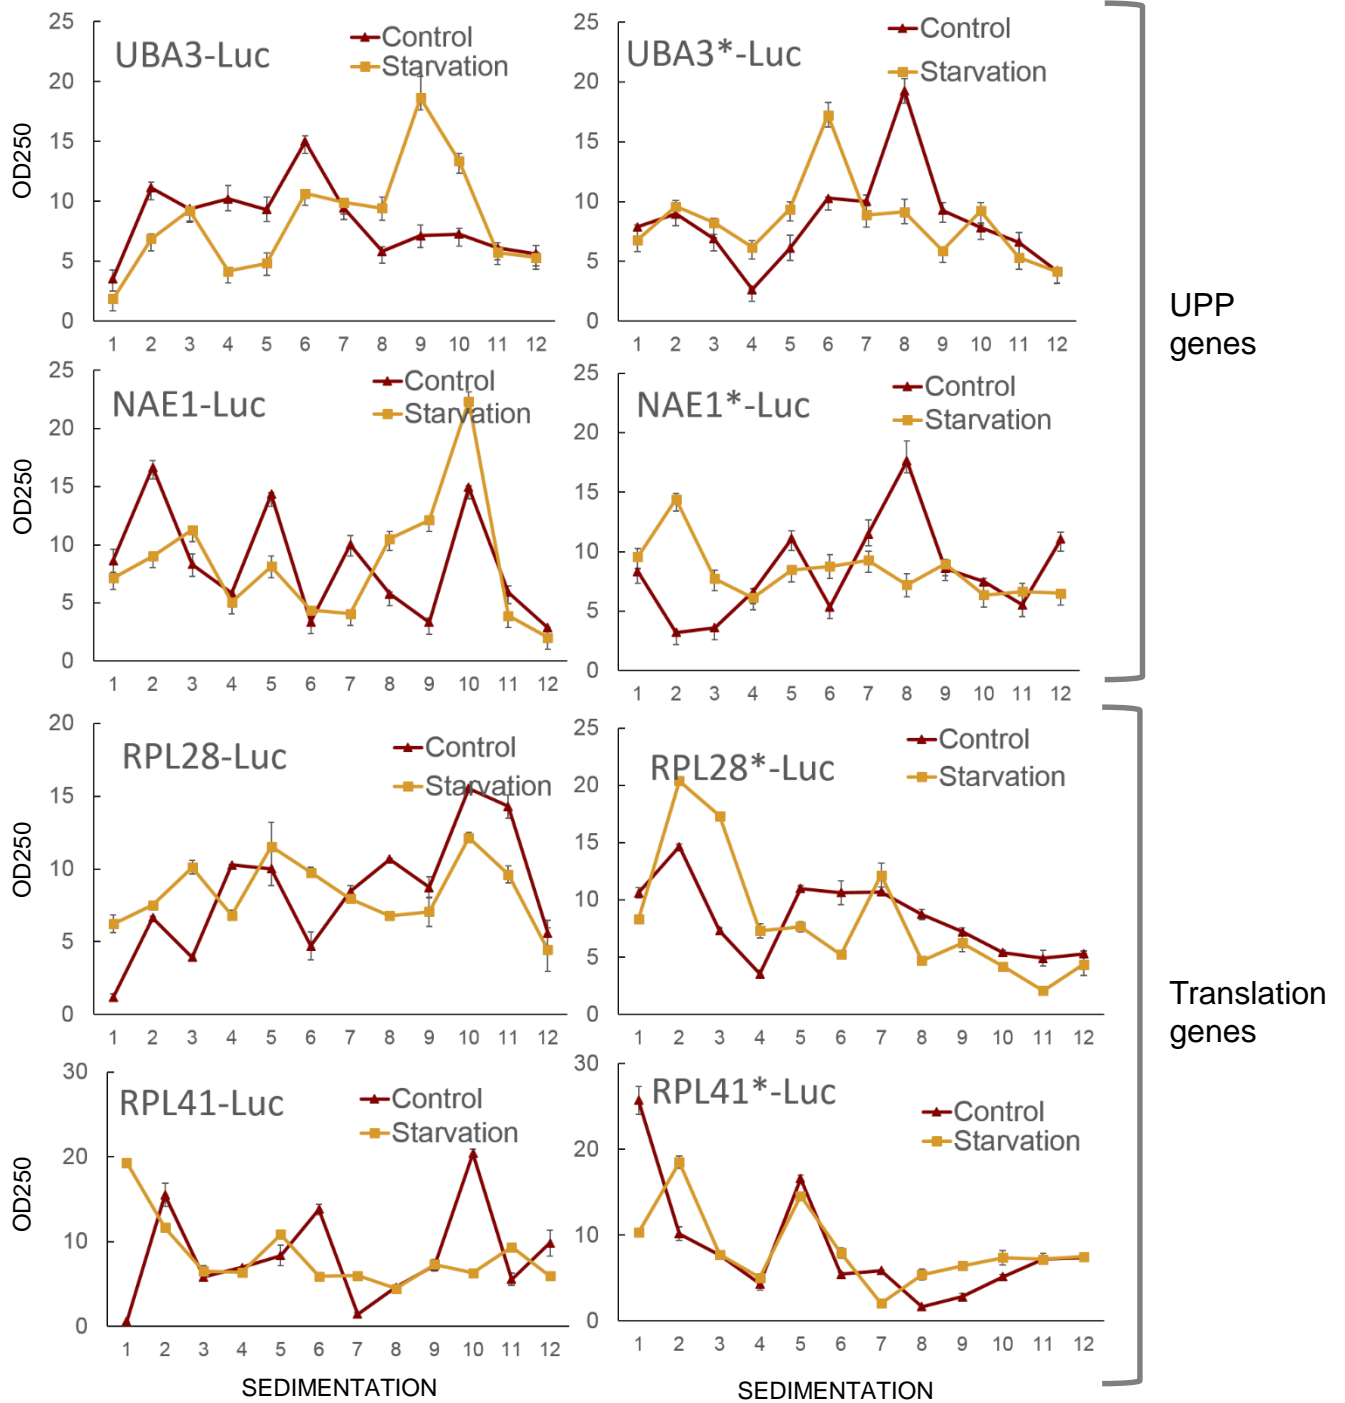

**Fig. S6.** Distribution of various Fluc reporter mRNAs on sucrose gradient fractions obtained from HEK293 cells with or without amino acid starvation. qRT-PCR was used to determine the amount of target mRNAs present in all the sedimentation fraction. Values were normalized so that the sum of all fraction = 100

**Supplementary Tables:**

| RNA                                                                                       | Primers                                                                                                                                                                                                                                                                                                                                                                                                                                                                                                                                    |
|-------------------------------------------------------------------------------------------|--------------------------------------------------------------------------------------------------------------------------------------------------------------------------------------------------------------------------------------------------------------------------------------------------------------------------------------------------------------------------------------------------------------------------------------------------------------------------------------------------------------------------------------------|
| GAPDH                                                                                     | Forward 5'- GAAGGTCGGAGTCAACGGAT<br>Reverse 5'- TGAAGGGGTCATTGATGGCA                                                                                                                                                                                                                                                                                                                                                                                                                                                                       |
| $\beta$ -Actin                                                                            | Forward 5'- ACGTTGCTATCCAGGCTGTG<br>Reverse 5'- GAGGGCATACCCCTCGTAGA                                                                                                                                                                                                                                                                                                                                                                                                                                                                       |
| UBA1                                                                                      | Forward 5'- AGCAGCCACTCAGTGCTATG<br>Reverse 5'- CTCCATGGGCTGATTTCCGT                                                                                                                                                                                                                                                                                                                                                                                                                                                                       |
| UBA3                                                                                      | Forward 5'- AGAATAGAGGAGCTGCTGGCT<br>Reverse 5'- TCAGTGCTCGGTTGAAATCA                                                                                                                                                                                                                                                                                                                                                                                                                                                                      |
| NAE1                                                                                      | Forward 5'- TGCTCAAGGAGCAGAAGTACG<br>Reverse 5'- TCAGTTCCTGTGGCTGTTGC                                                                                                                                                                                                                                                                                                                                                                                                                                                                      |
| ATG7                                                                                      | Forward 5'- CAGCAGTGACGATCGGATGA<br>Reverse 5'- GGCTGACGGGAAGGACATTA                                                                                                                                                                                                                                                                                                                                                                                                                                                                       |
| RPS5                                                                                      | Forward 5'- AGTGGAGCACCGATGATGTG<br>Reverse 5'- GCTCCACAATGGGACACTGA                                                                                                                                                                                                                                                                                                                                                                                                                                                                       |
| RPS11                                                                                     | Forward 5'- AGAGGACCATTGTCATCCGC<br>Reverse 5'- CGATCTGGACGTCCCTGAAG                                                                                                                                                                                                                                                                                                                                                                                                                                                                       |
| RPL6                                                                                      | Forward 5'- GGCCAAGCTTATTGCTTATAGACCG<br>Reverse 5'- GCATCCATGGCCATCTTGCAAGACGG                                                                                                                                                                                                                                                                                                                                                                                                                                                            |
| RPL28                                                                                     | Forward 5'- ACCATCAACAAGAATGCTCGC<br>Reverse 5'- CTCCAGCCCATATTGCAACCA                                                                                                                                                                                                                                                                                                                                                                                                                                                                     |
| Luciferase reporter mRNA primers: The same reverse primer was used for all the reporters. | Reverse 5'-CTTTATGTTTTTGGCGTCTTCCA<br>NAE1-For 5'- atagaatctcatccagataatgcattagaggatctacgacta<br>NAE1*-For 5'-atcgaatctcatccagataatgcactggaggatctgcggctg<br>UBA3-For 5'-ggtgttacgtataggtcactcaaggggtagtaaaagaatcatt<br>UBA3*-For 5'-ggcgttacctataggctcactcagggggtggtgaaaagaatcatt<br>RPL28-For 5'-gtcgtgcggaactgctccagttcctgatcaagaggaataagcag<br>RPL28*-For 5'-gtagtacgtaactgctcgtcgttctaataaagcgtaataagcaa<br>RPL41-For 5'-gccaaagtggaggaagaagcgaatgcgcaggctgaagcgcaaaaga<br>RPL41*-For 5'-gcgaagtggcgtaagaagcgaatgcgtcgtctaaagcgtaaacgt |

**Table S1. Primers used for RT-qPCR**

| <b>Ensembl gene ID</b> | <b>Gene</b> | <b>Gene Description</b>                                                     |
|------------------------|-------------|-----------------------------------------------------------------------------|
| ENSG00000008988        | RPS20       | ribosomal protein S20                                                       |
| ENSG00000037241        | RPL26L1     | ribosomal protein L26 like 1                                                |
| ENSG00000063177        | RPL18       | ribosomal protein L18                                                       |
| ENSG00000071082        | RPL31       | ribosomal protein L31                                                       |
| ENSG00000083845        | RPS5        | ribosomal protein S5                                                        |
| ENSG00000089009        | RPL6        | ribosomal protein L6                                                        |
| ENSG00000089157        | RPLP0       | ribosomal protein                                                           |
| ENSG00000100316        | RPL3        | ribosomal protein L3                                                        |
| ENSG00000105193        | RPS16       | ribosomal protein S16                                                       |
| ENSG00000105640        | RPL18A      | ribosomal protein L18a                                                      |
| ENSG00000108107        | RPL28       | ribosomal protein L28                                                       |
| ENSG00000108298        | RPL19       | ribosomal protein L19                                                       |
| ENSG00000109475        | RPL34       | ribosomal protein L34                                                       |
| ENSG00000110700        | RPS13       | ribosomal protein S13                                                       |
| ENSG00000112306        | RPS12       | ribosomal protein S12                                                       |
| ENSG00000115268        | RPS15       | ribosomal protein S15                                                       |
| ENSG00000122026        | RPL21       | ribosomal protein L21                                                       |
| ENSG00000122406        | RPL5        | ribosomal protein L5                                                        |
| ENSG00000124614        | RPS10       | ribosomal protein S10                                                       |
| ENSG00000125691        | RPL23       | ribosomal protein L23                                                       |
| ENSG00000130255        | RPL36       | ribosomal protein L36                                                       |
| ENSG00000131469        | RPL27       | ribosomal protein L27                                                       |
| ENSG00000134419        | RPS15A      | ribosomal protein S15a                                                      |
| ENSG00000136942        | RPL35       | ribosomal protein L35                                                       |
| ENSG00000137154        | RPS6        | ribosomal protein S6                                                        |
| ENSG00000137818        | RPLP1       | ribosomal protein                                                           |
| ENSG00000137876        | RSL24D1     | ribosomal L24 domain containing 1                                           |
| ENSG00000138326        | RPS24       | ribosomal protein S24                                                       |
| ENSG00000140988        | RPS2        | ribosomal protein S2                                                        |
| ENSG00000142534        | RPS11       | ribosomal protein S11                                                       |
| ENSG00000142541        | RPL13A      | ribosomal protein L13a                                                      |
| ENSG00000142676        | RPL11       | ribosomal protein L11                                                       |
| ENSG00000142937        | RPS8        | ribosomal protein S8                                                        |
| ENSG00000143947        | RPS27A      | ribosomal protein S27a                                                      |
| ENSG00000144713        | RPL32       | ribosomal protein L32                                                       |
| ENSG00000145425        | RPS3A       | ribosomal protein S3A                                                       |
| ENSG00000145592        | RPL37       | ribosomal protein L37                                                       |
| ENSG00000147604        | RPL7        | ribosomal protein L7                                                        |
| ENSG00000149273        | RPS3        | ribosomal protein S3                                                        |
| ENSG00000149806        | FAU         | Finkel-Biskis-Reilly murine sarcoma virus (FBR-MuSV) ubiquitously expressed |



|                 |         |                                                           |
|-----------------|---------|-----------------------------------------------------------|
| ENSG00000156482 | RPL30   | ribosomal protein L30                                     |
| ENSG00000161016 | RPL8    | ribosomal protein L8                                      |
| ENSG00000162244 | RPL29   | ribosomal protein L29                                     |
| ENSG00000163584 | RPL22L1 | ribosomal protein L22-like 1                              |
| ENSG00000163682 | RPL9    | ribosomal protein L9                                      |
| ENSG00000164587 | RPS14   | ribosomal protein S14                                     |
| ENSG00000165502 | RPL36AL | ribosomal protein L36a like                               |
| ENSG00000166441 | RPL27A  | ribosomal protein L27a                                    |
| ENSG00000167526 | RPL13   | ribosomal protein L13                                     |
| ENSG00000168028 | RPSA    | ribosomal protein SA                                      |
| ENSG00000171858 | RPS21   | ribosomal protein S21                                     |
| ENSG00000171863 | RPS7    | ribosomal protein S7                                      |
| ENSG00000172809 | RPL38   | ribosomal protein L38                                     |
| ENSG00000174444 | RPL4    | ribosomal protein L4                                      |
| ENSG00000174748 | RPL15   | ribosomal protein L15                                     |
| ENSG00000182899 | RPL35A  | ribosomal protein L35a                                    |
| ENSG00000185088 | RPS27L  | ribosomal protein S27 like                                |
| ENSG00000186468 | RPS23   | ribosomal protein S23                                     |
| ENSG00000188846 | RPL14   | ribosomal protein L14                                     |
| ENSG00000197728 | RPS26   | 40S ribosomal protein S26                                 |
| ENSG00000197728 | RPS26   | ribosomal protein S26                                     |
| ENSG00000197756 | RPL37A  | ribosomal protein L37a                                    |
| ENSG00000197958 | RPL12   | ribosomal protein L12                                     |
| ENSG00000198242 | RPL23A  | ribosomal protein L23a                                    |
| ENSG00000198755 | RPL10A  | ribosomal protein L10a                                    |
| ENSG00000198918 | RPL39   | ribosomal protein L39                                     |
| ENSG00000213741 | RPS29   | ribosomal protein S29                                     |
| ENSG00000221983 | UBA52   | ubiquitin A-52 residue ribosomal protein fusion product 1 |
| ENSG00000227794 | RPS18   | ribosomal protein S18                                     |
| ENSG00000229117 | RPL41   | ribosomal protein L41                                     |
| ENSG00000233927 | RPS28   | ribosomal protein S28                                     |
| ENSG00000265681 | RPL17   | ribosomal protein L17                                     |

Table S2: Translation related genes

| Ensembl gene ID | Gene    | Gene Description                                                                                                                       |
|-----------------|---------|----------------------------------------------------------------------------------------------------------------------------------------|
| ENSG00000003096 | KLHL13  | kelch-like family member 13 [Source:HGNC Symbol;Acc:HGNC:22931]                                                                        |
| ENSG00000008853 | RHOBTB2 | Rho-related BTB domain containing 2 [Source:HGNC Symbol;Acc:HGNC:18756]                                                                |
| ENSG00000009335 | UBE3C   | ubiquitin protein ligase E3C [Source:HGNC Symbol;Acc:HGNC:16803]                                                                       |
| ENSG00000012048 | BRCA1   | breast cancer 1, early onset [Source:HGNC Symbol;Acc:HGNC:1100]                                                                        |
| ENSG00000033178 | UBA6    | ubiquitin like modifier activating enzyme 6 [Source:HGNC Symbol;Acc:HGNC:25581]                                                        |
| ENSG00000044090 | CUL7    | cullin 7 [Source:HGNC Symbol;Acc:HGNC:21024]                                                                                           |
| ENSG00000049759 | NEDD4L  | neural precursor cell expressed, developmentally down-regulated 4-like, E3 ubiquitin protein ligase [Source:HGNC Symbol;Acc:HGNC:7728] |
| ENSG00000055130 | CUL1    | cullin 1 [Source:HGNC Symbol;Acc:HGNC:2551]                                                                                            |
| ENSG00000069869 | NEDD4   | neural precursor cell expressed, developmentally down-regulated 4, E3 ubiquitin protein ligase [Source:HGNC Symbol;Acc:HGNC:7727]      |
| ENSG00000072401 | UBE2D1  | ubiquitin-conjugating enzyme E2D 1 [Source:HGNC Symbol;Acc:HGNC:12474]                                                                 |
| ENSG00000072803 | FBXW11  | F-box and WD repeat domain containing 11 [Source:HGNC Symbol;Acc:HGNC:13607]                                                           |
| ENSG00000078043 | PIAS2   | protein inhibitor of activated STAT, 2 [Source:HGNC Symbol;Acc:HGNC:17311]                                                             |
| ENSG00000078140 | UBE2K   | ubiquitin-conjugating enzyme E2K [Source:HGNC Symbol;Acc:HGNC:4914]                                                                    |
| ENSG00000078747 | ITCH    | itchy E3 ubiquitin protein ligase [Source:HGNC Symbol;Acc:HGNC:13890]                                                                  |
| ENSG00000079999 | KEAP1   | kelch-like ECH-associated protein 1 [Source:HGNC Symbol;Acc:HGNC:23177]                                                                |
| ENSG00000081307 | UBA5    | ubiquitin like modifier activating enzyme 5 [Source:HGNC Symbol;Acc:HGNC:23230]                                                        |
| ENSG00000094880 | CDC23   | cell division cycle 23 [Source:HGNC Symbol;Acc:HGNC:1724]                                                                              |
| ENSG00000100023 | PPIL2   | peptidylprolyl isomerase (cyclophilin)-like 2 [Source:HGNC Symbol;Acc:HGNC:9261]                                                       |
| ENSG00000100387 | RBX1    | ring-box 1, E3 ubiquitin protein ligase [Source:HGNC Symbol;Acc:HGNC:9928]                                                             |
| ENSG00000101966 | XIAP    | X-linked inhibitor of apoptosis, E3 ubiquitin protein ligase [Source:HGNC Symbol;Acc:HGNC:592]                                         |
| ENSG00000103657 | HERC1   | HECT and RLD domain containing E3 ubiquitin protein ligase family member 1 [Source:HGNC Symbol;Acc:HGNC:4867]                          |
| ENSG00000104343 | UBE2W   | ubiquitin-conjugating enzyme E2W (putative) [Source:HGNC Symbol;Acc:HGNC:25616]                                                        |
| ENSG00000105229 | PIAS4   | protein inhibitor of activated STAT, 4 [Source:HGNC Symbol;Acc:HGNC:17002]                                                             |
| ENSG00000105325 | FZR1    | fizzy/cell division cycle 20 related 1 [Source:HGNC Symbol;Acc:HGNC:24824]                                                             |
| ENSG00000108395 | TRIM37  | tripartite motif containing 37 [Source:HGNC Symbol;Acc:HGNC:7523]                                                                      |
| ENSG00000109332 | UBE2D3  | ubiquitin-conjugating enzyme E2D 3 [Source:HGNC Symbol;Acc:HGNC:12476]                                                                 |
| ENSG00000109670 | FBXW7   | F-box and WD repeat domain containing 7, E3 ubiquitin protein ligase [Source:HGNC Symbol;Acc:HGNC:16712]                               |
| ENSG00000110330 | BIRC2   | baculoviral IAP repeat containing 2 [Source:HGNC Symbol;Acc:HGNC:590]                                                                  |
| ENSG00000110395 | CBL     | Cbl proto-oncogene, E3 ubiquitin protein ligase [Source:HGNC Symbol;Acc:HGNC:1541]                                                     |
| ENSG00000113558 | SKP1    | S-phase kinase-associated protein 1 [Source:HGNC Symbol;Acc:HGNC:10899]                                                                |
| ENSG00000114062 | UBE3A   | ubiquitin protein ligase E3A [Source:HGNC Symbol;Acc:HGNC:12496]                                                                       |
| ENSG00000114423 | CBLB    | Cbl proto-oncogene B, E3 ubiquitin protein ligase [Source:HGNC Symbol;Acc:HGNC:1542]                                                   |
| ENSG00000115392 | FANCL   | Fanconi anemia, complementation group L [Source:HGNC Symbol;Acc:HGNC:20748]                                                            |
| ENSG00000117399 | CDC20   | cell division cycle 20 [Source:HGNC Symbol;Acc:HGNC:1723]                                                                              |
| ENSG00000123124 | WWP1    | WW domain containing E3 ubiquitin protein ligase 1 [Source:HGNC Symbol;Acc:HGNC:17004]                                                 |
| ENSG00000126261 | UBA2    | ubiquitin-like modifier activating enzyme 2 [Source:HGNC Symbol;Acc:HGNC:30661]                                                        |
| ENSG00000130985 | UBA1    | ubiquitin like modifier activating enzyme 1 [Source:HGNC Symbol;Acc:HGNC:12469]                                                        |
| ENSG00000132388 | UBE2G1  | ubiquitin-conjugating enzyme E2G 1 [Source:HGNC Symbol;Acc:HGNC:12482]                                                                 |

|                 |        |                                                                                                                      |
|-----------------|--------|----------------------------------------------------------------------------------------------------------------------|
| ENSG00000134086 | VHL    | von Hippel-Lindau tumor suppressor, E3 ubiquitin protein ligase [Source:HGNC Symbol;Acc:HGNC:12687]                  |
| ENSG00000135679 | MDM2   | MDM2 proto-oncogene, E3 ubiquitin protein ligase [Source:HGNC Symbol;Acc:HGNC:6973]                                  |
| ENSG00000138641 | HERC3  | HECT and RLD domain containing E3 ubiquitin protein ligase 3 [Source:HGNC Symbol;Acc:HGNC:4876]                      |
| ENSG00000139842 | CUL4A  | cullin 4A [Source:HGNC Symbol;Acc:HGNC:2554]                                                                         |
| ENSG00000140367 | UBE2Q2 | ubiquitin-conjugating enzyme E2Q family member 2 [Source:HGNC Symbol;Acc:HGNC:19248]                                 |
| ENSG00000140464 | PML    | promyelocytic leukemia [Source:HGNC Symbol;Acc:HGNC:9113]                                                            |
| ENSG00000143207 | RFWD2  | ring finger and WD repeat domain 2, E3 ubiquitin protein ligase [Source:HGNC Symbol;Acc:HGNC:17440]                  |
| ENSG00000144744 | UBA3   | ubiquitin-like modifier activating enzyme 3 [Source:HGNC Symbol;Acc:HGNC:12470]                                      |
| ENSG00000145604 | SKP2   | S-phase kinase-associated protein 2, E3 ubiquitin protein ligase [Source:HGNC Symbol;Acc:HGNC:10901]                 |
| ENSG00000151148 | UBE3B  | ubiquitin protein ligase E3B [Source:HGNC Symbol;Acc:HGNC:13478]                                                     |
| ENSG00000153107 | ANAPC1 | anaphase promoting complex subunit 1 [Source:HGNC Symbol;Acc:HGNC:19988]                                             |
| ENSG00000154582 | TCEB1  | transcription elongation factor B (SIII), polypeptide 1 (15kDa, elongin C) [Source:HGNC Symbol;Acc:HGNC:11617]       |
| ENSG00000158290 | CUL4B  | cullin 4B [Source:HGNC Symbol;Acc:HGNC:2555]                                                                         |
| ENSG00000159202 | UBE2Z  | ubiquitin-conjugating enzyme E2Z [Source:HGNC Symbol;Acc:HGNC:25847]                                                 |
| ENSG00000159593 | NAE1   | NEDD8 activating enzyme E1 subunit 1 [Source:HGNC Symbol;Acc:HGNC:621]                                               |
| ENSG00000160087 | UBE2J2 | ubiquitin-conjugating enzyme E2, J2 [Source:HGNC Symbol;Acc:HGNC:19268]                                              |
| ENSG00000160714 | UBE2Q1 | ubiquitin-conjugating enzyme E2Q family member 1 [Source:HGNC Symbol;Acc:HGNC:15698]                                 |
| ENSG00000162298 | SYVN1  | synovial apoptosis inhibitor 1, synoviolin [Source:HGNC Symbol;Acc:HGNC:20738]                                       |
| ENSG00000163743 | RCHY1  | ring finger and CHY zinc finger domain containing 1, E3 ubiquitin protein ligase [Source:HGNC Symbol;Acc:HGNC:17479] |
| ENSG00000166167 | BTRC   | beta-transducin repeat containing E3 ubiquitin protein ligase [Source:HGNC Symbol;Acc:HGNC:1144]                     |
| ENSG00000166266 | CUL5   | cullin 5 [Source:HGNC Symbol;Acc:HGNC:2556]                                                                          |
| ENSG00000174989 | FBXW8  | F-box and WD repeat domain containing 8 [Source:HGNC Symbol;Acc:HGNC:13597]                                          |
| ENSG00000175104 | TRAF6  | TNF receptor-associated factor 6, E3 ubiquitin protein ligase [Source:HGNC Symbol;Acc:HGNC:12036]                    |
| ENSG00000176248 | ANAPC2 | anaphase promoting complex subunit 2 [Source:HGNC Symbol;Acc:HGNC:19989]                                             |
| ENSG00000176386 | CDC26  | cell division cycle 26 [Source:HGNC Symbol;Acc:HGNC:17839]                                                           |
| ENSG00000177889 | UBE2N  | ubiquitin-conjugating enzyme E2N [Source:HGNC Symbol;Acc:HGNC:12492]                                                 |
| ENSG00000184182 | UBE2F  | ubiquitin-conjugating enzyme E2F (putative) [Source:HGNC Symbol;Acc:HGNC:12480]                                      |
| ENSG00000185019 | UBOX5  | U-box domain containing 5 [Source:HGNC Symbol;Acc:HGNC:17777]                                                        |
| ENSG00000185651 | UBE2L3 | ubiquitin-conjugating enzyme E2L 3 [Source:HGNC Symbol;Acc:HGNC:12488]                                               |
| ENSG00000186591 | UBE2H  | ubiquitin-conjugating enzyme E2H [Source:HGNC Symbol;Acc:HGNC:12484]                                                 |
| ENSG00000196510 | ANAPC7 | anaphase promoting complex subunit 7 [Source:HGNC Symbol;Acc:HGNC:17380]                                             |
| ENSG00000197170 | PSMD12 | proteasome 26S subunit, non-ATPase 12 [Source:HGNC Symbol;Acc:HGNC:9557]                                             |
| ENSG00000197548 | ATG7   | autophagy related 7 [Source:HGNC Symbol;Acc:HGNC:16935]                                                              |
| ENSG00000198373 | WWP2   | WW domain containing E3 ubiquitin protein ligase 2 [Source:HGNC Symbol;Acc:HGNC:16804]                               |
| ENSG00000198742 | SMURF1 | SMAD specific E3 ubiquitin protein ligase 1 [Source:HGNC Symbol;Acc:HGNC:16807]                                      |
| ENSG00000198833 | UBE2J1 | ubiquitin-conjugating enzyme E2, J1 [Source:HGNC Symbol;Acc:HGNC:17598]                                              |

Table S3: UPP genes.
